# Supplementary material for: A hybrid-membrane migration method to isolate high-purity adipose-derived stem cells from fat tissues
Source: PubMed Central journal article supplement (PMC4429558; doi:10.1038/srep10217), 2015-05-13
Supplement: srep10217-s1.pdf [file srep10217-s1.pdf]

Supplementary Material for - A hybrid-membrane migration method to isolate high-purity  
adipose-derived stem cells from fat tissues

Akon Higuchi<sup>1,2,3,4</sup>, Ching-Tang Wang<sup>1</sup>, Qing-Dong Ling<sup>5,6</sup>, Henry Hsin-chung Lee<sup>7</sup>, S. Suresh Kumar<sup>8</sup>, Yung Chang<sup>9</sup>, Abdullah A. Alarfaj<sup>2</sup>, Murugan A. Munusamy<sup>2</sup>, Shih-Tien Hsu<sup>10</sup>, Gwo-Jang Wu<sup>11</sup>, Akihiko Umezawa<sup>3</sup>

<sup>1</sup>Department of Chemical and Materials Engineering, National Central University, Jhong-li, Taoyuan, Taiwan

<sup>2</sup>Department of Botany and Microbiology, King Saud University, Riyadh, Saudi Arabia

<sup>3</sup>Department of Reproduction, National Research Institute for Child Health and Development, Tokyo, Japan

<sup>4</sup>Nano Medical Engineering Laboratory, RIKEN, Wako, Saitama, Japan

<sup>5</sup>Institute of Systems Biology and Bioinformatics, National Central University, Jhong-li, Taoyuan, Taiwan

<sup>6</sup>Cathay Medical Research Institute, Cathay General Hospital, Taipei, Taiwan

<sup>7</sup>Department of Surgery, Cathay General Hospital, Taipei, Taiwan

<sup>8</sup>Department of Medical Microbiology and Parasitology, Universiti Putra Malaysia, Slangor, Malaysia

<sup>9</sup>Department of Chemical Engineering, R&D Center for Membrane Technology, Chung Yuan Christian University, Jhong-li, Taoyuan, Taiwan

<sup>10</sup>Department of Internal Medicine, Taiwan Landseed Hospital, Pingjen, Taoyuan, Taiwan

<sup>11</sup>Graduate Institute of Medical Sciences and Department of Obstetrics & Gynecology, Tri-Service General Hospital, National Defense Medical Center, Taipei, Taiwan

## SUPPLEMENTARY FIGURES

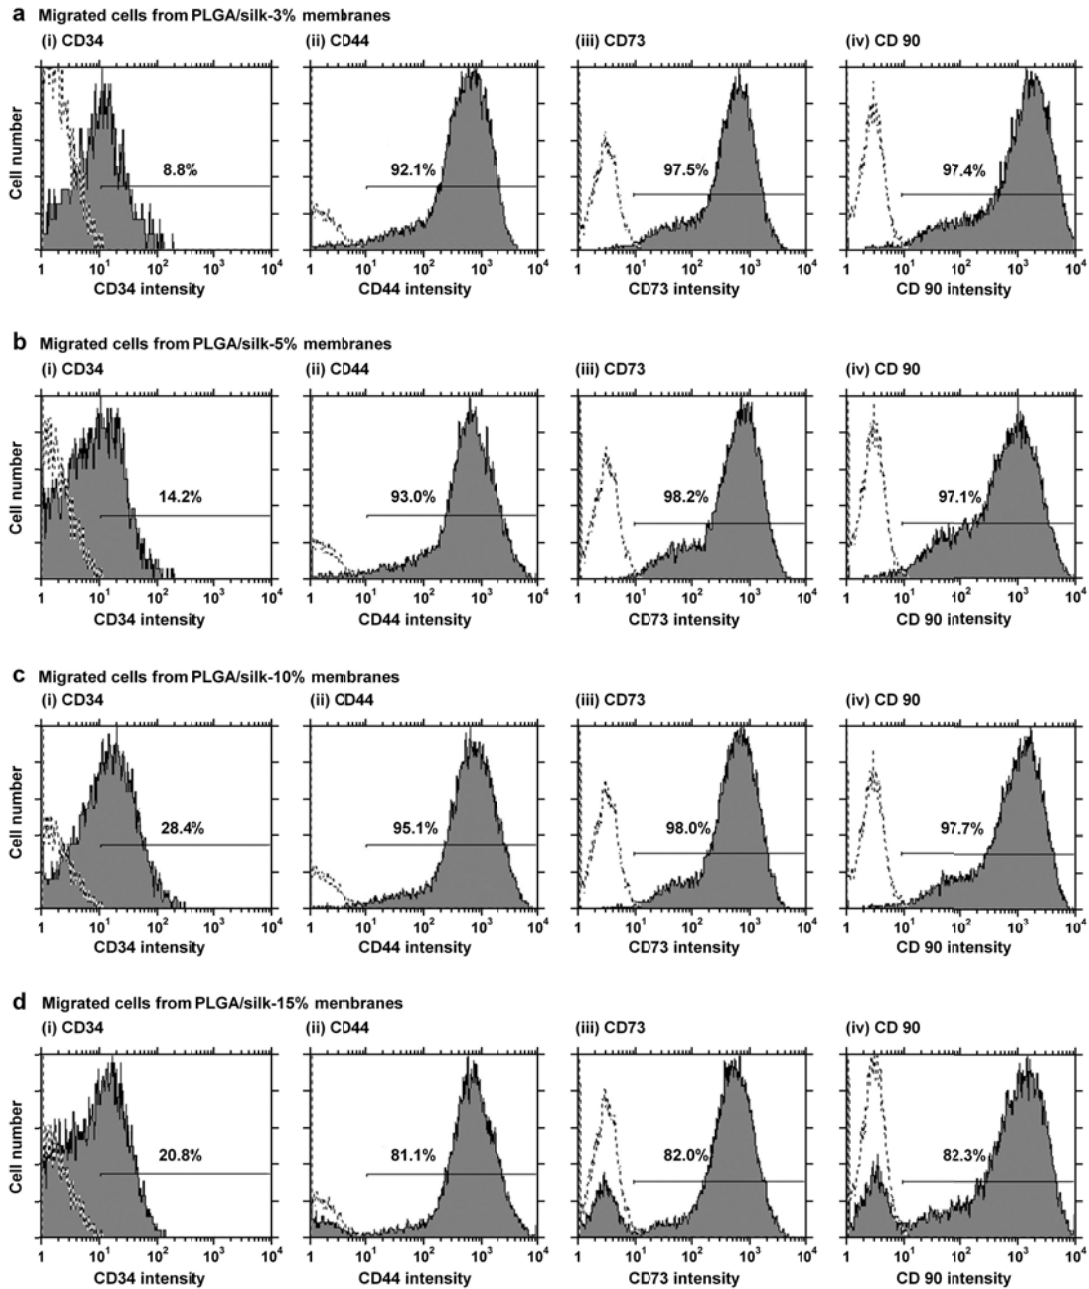

**Supplementary Figure 1.** CD34 (i) and MSC markers (CD44 (ii), CD73 (iii), and CD90 (iv)) expression analyzed by flow cytometry. Flow cytometry scattergrams of the migrated cells from (a) PLGA/silk-3%, (b) PLGA/silk-5%, (c) PLGA/silk-10% and (d) PLGA/silk-15% membranes and subsequently cultured for 15 days after SVF was permeated through the membranes. The dotted lines indicate cells labeled with the isotype controls.

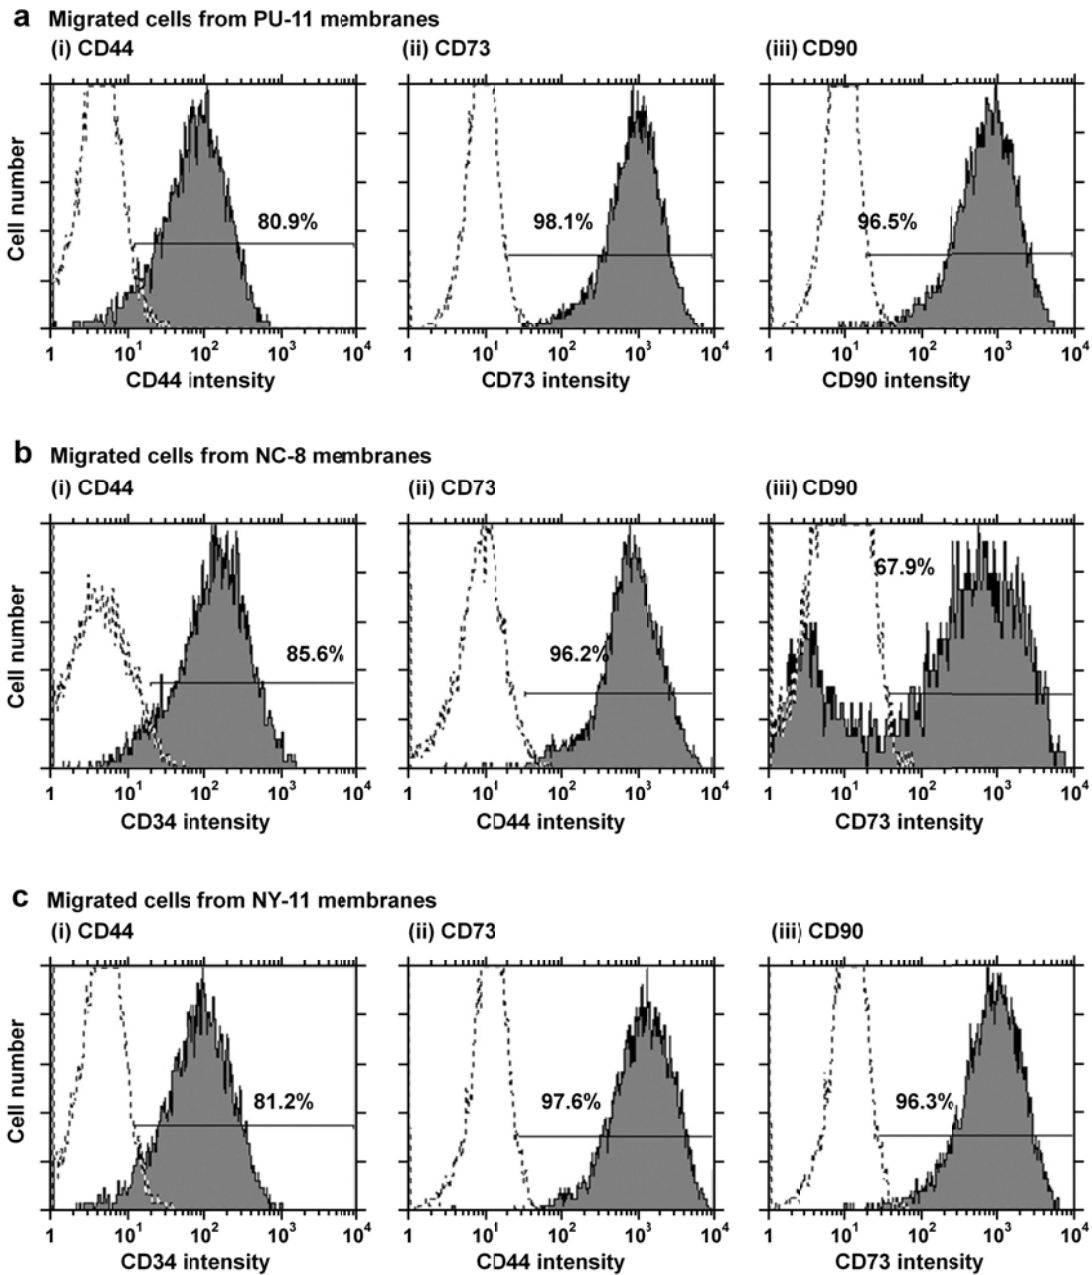

**Supplementary Figure 2.** MSC markers (CD44 [i], CD73 [ii], and CD90 [iii]) expression analyzed by flow cytometry. Flow cytometry scattergrams of the migrated cells from (a) PU-11, (b) NC-8 and (c) NY-11 membranes and subsequently cultured for 15 days after SVF was permeated through the membranes. The dotted lines indicate cells labeled with the isotype controls.

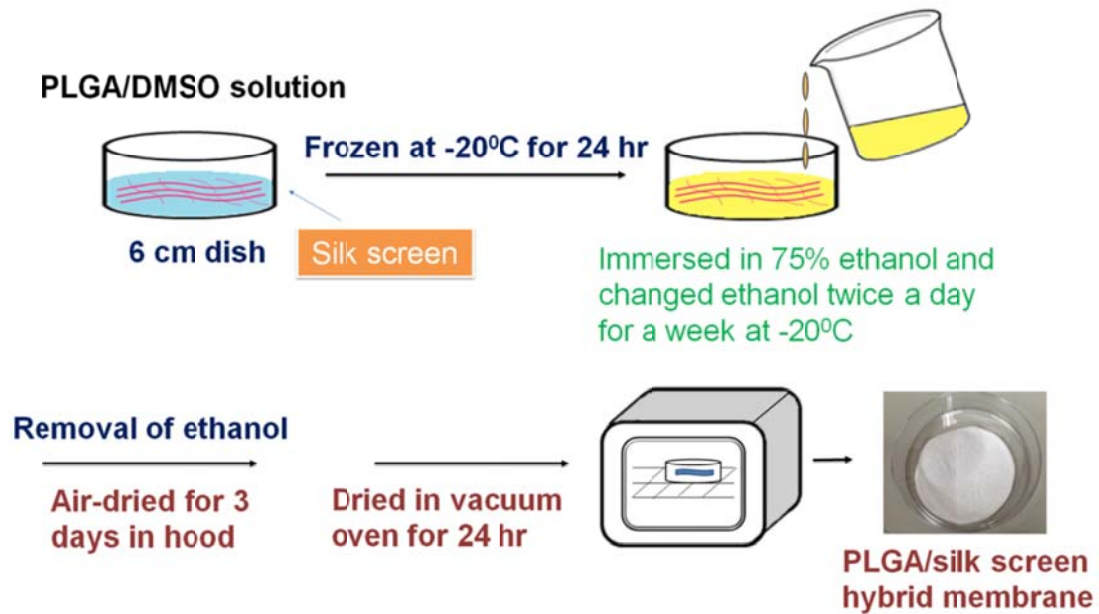

**Supplementary Figure 3.** Manufacturing procedures of the PLGA/silk membranes prepared by the freeze-extraction method.

## SUPPLEMENTARY TABLE

**Supplementary Table 1** Characteristics of membranes used in this study.

| Membranes     | Materials          | Pore size ( $\mu\text{m}$ ) | Porosity (%) | Thickness ( $\mu\text{m}$ ) |
|---------------|--------------------|-----------------------------|--------------|-----------------------------|
| Silk-PLGA-3%  | Silk & PLGA        | 24.4                        |              |                             |
| Silk-PLGA-5%  | Silk & PLGA        | 22.4                        |              |                             |
| Silk-PLGA-10% | Silk & PLGA        | 20.8                        |              |                             |
| Silk-PLGA-15% | Silk screen & PLGA | 18.2                        |              |                             |
| PU-11         | Polyurethane       | 11.0                        | 86           | 1200                        |
| NC-8          | Nitrocellulose     | 8.0                         | 84           | 135                         |
| NY11          | Nylon              | 11.0                        | 6            | 65                          |
